# Supplementary material for: Comparative investigations of high-rate NaCrO2 cathodes towards wide-temperature-tolerant pouch-type Na-ion batteries from −15 to 55 °C: nanowires vs. bulk
Source: Royal Society of Chemistry journal article supplement (doi:10.1039/c9ta01540j), 2019-01-01
Supplement: c9ta01540j1.pdf [file c9ta01540j1.pdf]

## Supporting Information

**Comparative investigations of high-rate NaCrO<sub>2</sub> cathodes towards wide-temperature-tolerant pouch-type Na-ion batteries from -15 to 55 °C:**

**Nanowires vs. Bulk**

Longwei Liang, Wenheng Zhang, Denis Dienguila Kionga, Xuan Sun, Jinyang Zhang,  
Linrui Hou, Yang Liu and Changzhou Yuan\*

School of Materials Science & Engineering, University of Jinan, Jinan, 250022, P. R.  
China

\*E-mail: [mse\\_yuancz@ujn.edu.cn](mailto:mse_yuancz@ujn.edu.cn); [ayuancz@163.com](mailto:ayuancz@163.com)

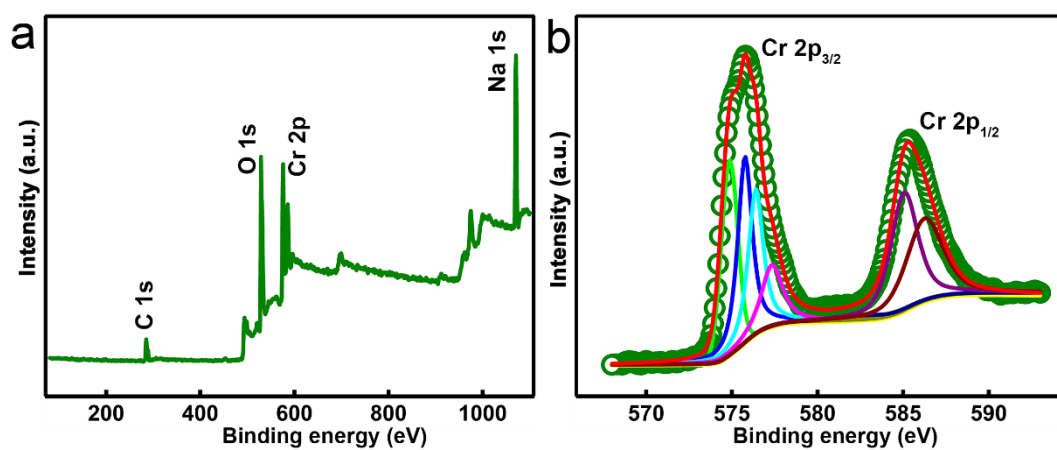

**Fig. S1** (a) XPS survey and (b) typical high-resolution elemental Cr 2p spectra and corresponding fitting profiles of the NCO NWs

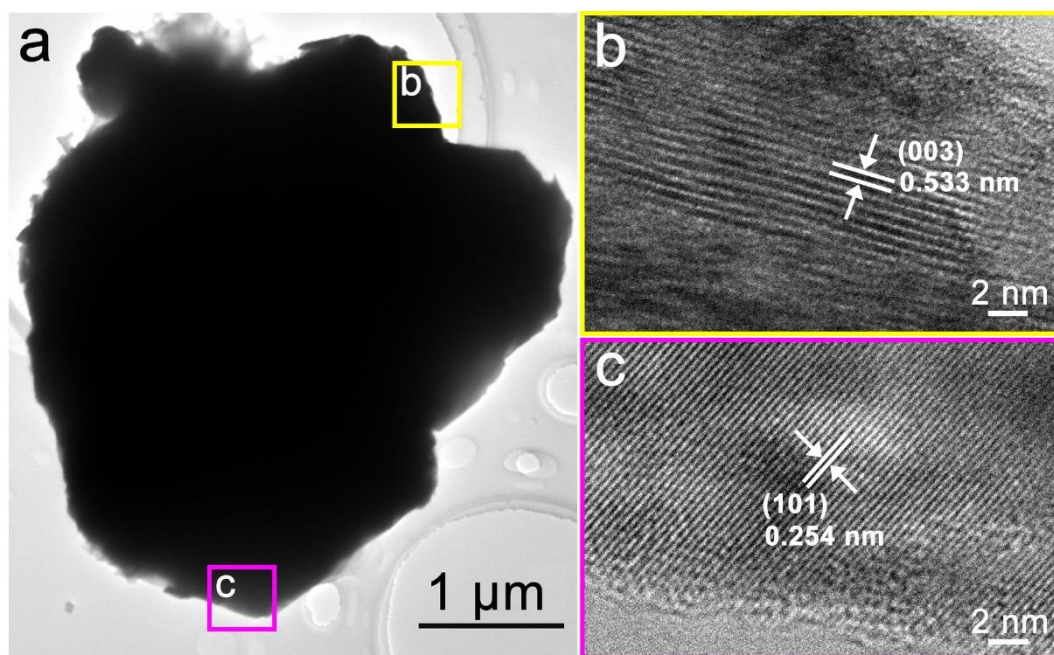

**Fig. S2** (a) TEM and (b-c) HRTEM images of a single BNCO particle. The images in panels (b) and (c) are taken from the yellow and pink rectangle regions in panel (a), respectively

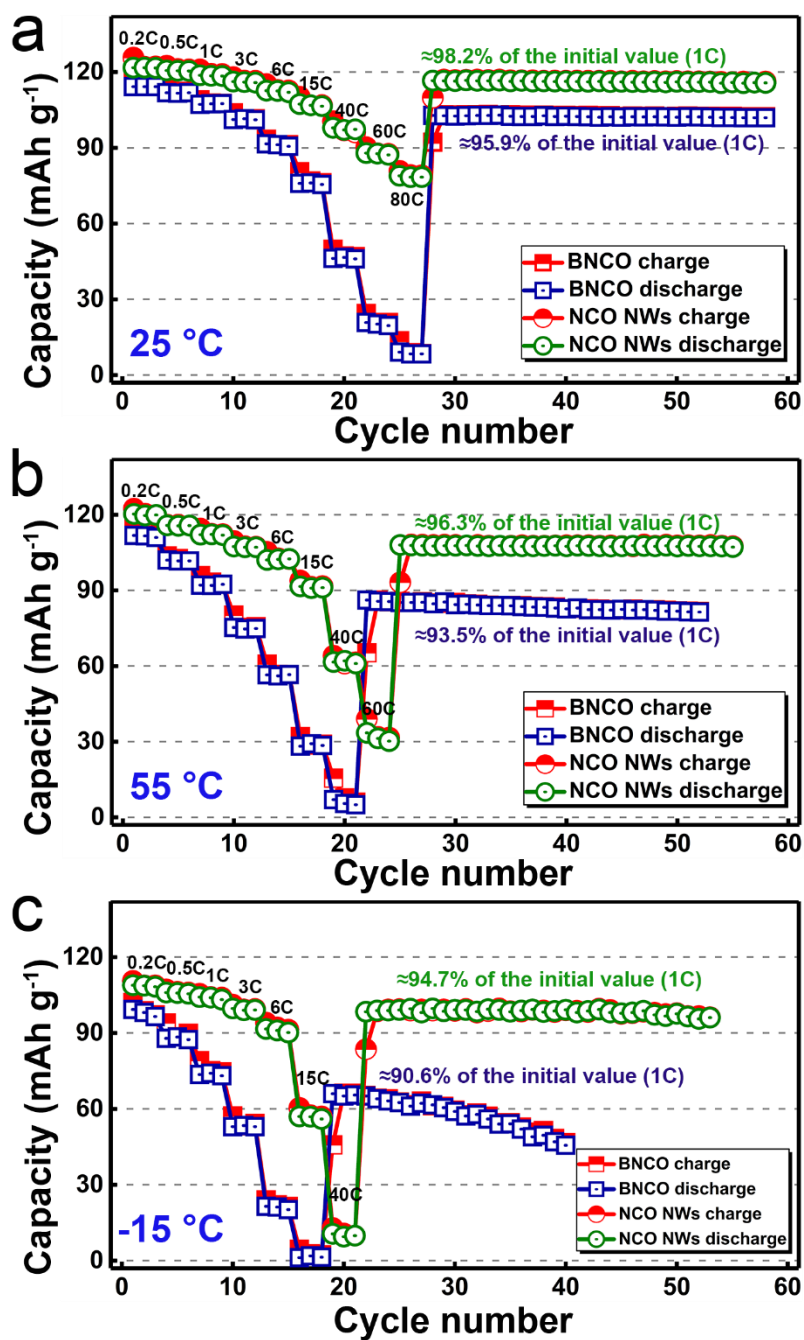

**Fig. S3** Typical rate properties of both BNCO and NCO NWs at various current rates as indicated (charged/discharged at the same rate) with three cycles per step and then back to 1 C in the voltage of 2.0 – 3.6 V at (a) 25 °C, (b) 55 °C and (c) -15 °C, respectively

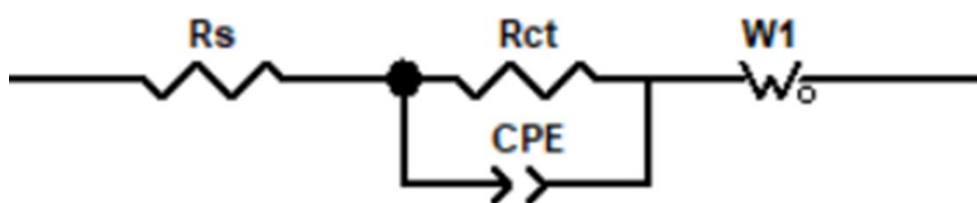

**Fig. S4** Equivalent circuit model used to fit the EIS profiles

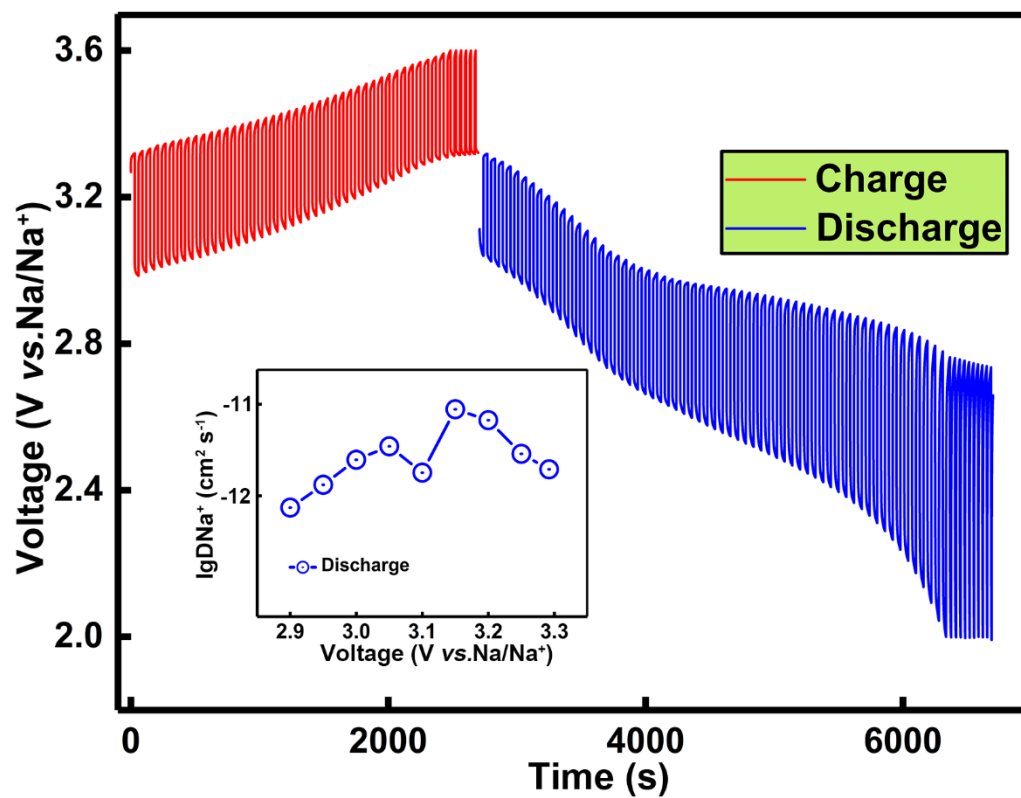

**Fig. S5** GITT curves of the BNCO electrode for the charge and discharge process.

The inset is the chemical diffusion coefficient of Na<sup>+</sup> ions as a function of voltage calculated from the GITT curve (after 300 cycles, current density: 2 C)

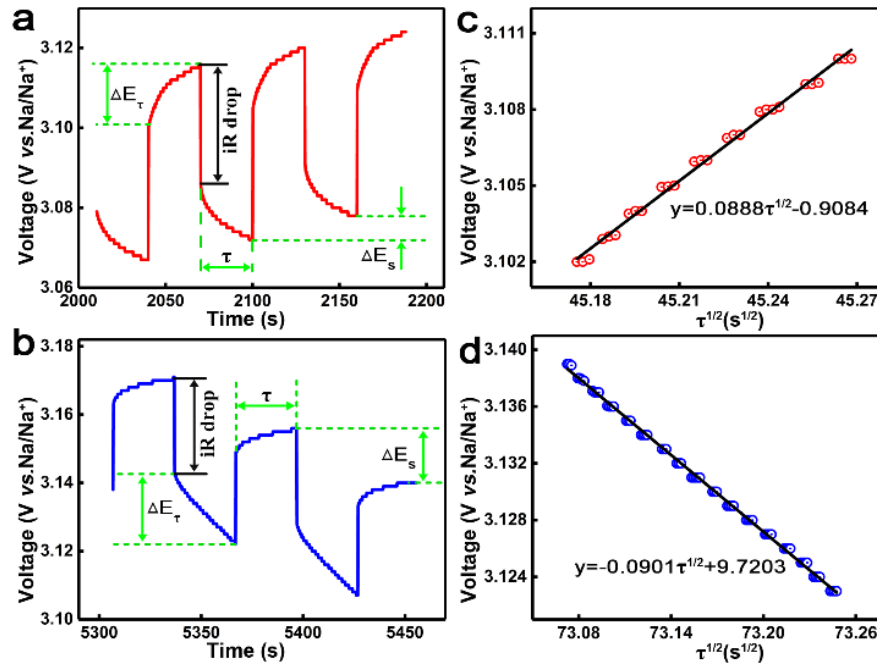

**Fig. S6** (a) Detailed schematic diagram of a single GITT titration step at ~3.10 V during the charging process and (b) ~3.15 V during the discharging process and (c, d) their corresponding linear behavior of the  $E$  vs  $\tau^{1/2}$  relationship of NCO NWs

The calculation of  $D_{Na+}$  is based on the equation:<sup>1-4</sup>

$$D_{Na+} = \frac{4}{\pi\tau} \left( \frac{m_B V_m}{M_B S} \right)^2 \left( \frac{\Delta E_s}{\Delta E_\tau} \right)^2 \quad \tau \ll \frac{l^2}{D_{Na+}}$$

where  $m_B$ ,  $M_B$ ,  $V_m$ ,  $S$  stand for mass, molecular weight, molar volume and surface area of the cathode material respectively.  $\Delta E_s$  and  $\Delta E_\tau$  are the difference between two consecutive stable voltages after relaxation, and the transient voltage-change during a single titration step.

## Reference

- 1 Y.-Y. Wang, B.-H. Hou, J.-Z. Guo, Q.-L. Ning, W.-L. Pang, J. W. Wang, C.-L. Lü and X.-L. Wu, *Adv. Energy Mater.*, 2018, **8**, 1703252.
- 2 M. Chen, D. Cortie, Z. Hu, H. Jin, S. Wang, Q. Gu, W. Hua, E. Wang, W. Lai, L. Chen, S.-L. Chou, X.-L. Wang and S.-X. Dou, *Adv. Energy Mater.*, 2018, **8**,

1800944.

- 3 X. Wang, C. Wang, K. Han, C. Niu, J. Meng, P. Hu, X. Xu, Z. Wang, Q. Li, C. Han, Y. Huang, L. Q. Mai, *Adv. Energy Mater.*, 2018, **8**, 1802180.
- 4 H. X. Li, T. Jin, X. B. Chen, Y. Q. Lai, Z. A. Zhang, W. Z. Bao and L. F. Jiao, *Adv. Energy Mater.*, 2018, **8**, 1801418.



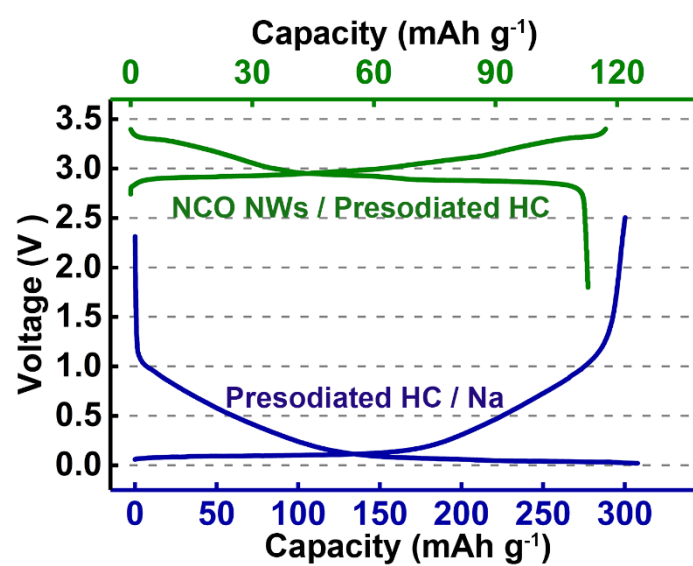

**Fig. S7** The initial charge/discharge curve at 0.1 C within a potential range of 1.8 – 3.4 V along with the typical charge/discharge profiles of presodiated HC versus Na metal (0 – 2.5 V, 0.1 C)

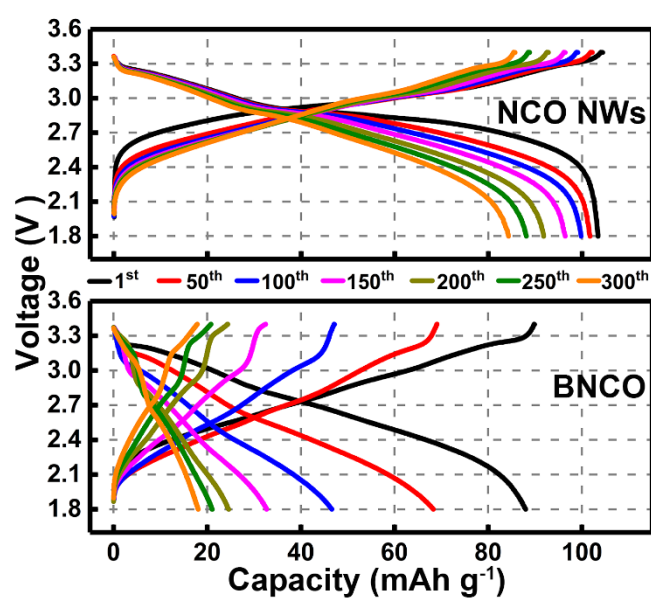

**Fig. S8** Typical charge–discharge profiles charged 1 C/discharged 2 C rate within a voltage range of 1.8 – 3.4 V at 55 °C for different cycles of the BNCO (the lower) and NCO NWs (the upper) full cells

**Table S1.** Lattice parameters calculated from Rietveld refinement of XRD data of the BNCO

|                  | BNCO         |
|------------------|--------------|
| Space group      | $R\bar{3}m$  |
| Crystal system   | Rhombohedral |
| $a/\text{\AA}$   | 2.9743       |
| $b/\text{\AA}$   | 2.9743       |
| $c/\text{\AA}$   | 15.9678      |
| $V/\text{\AA}^3$ | 122.32       |

**Table S2.** EIS fitted parameters of two samples after different cycles

| Samples | Cycles | $R_s$ ( $\Omega$ ) | $R_{ct}$ ( $\Omega$ ) | $\sigma$ ( $\Omega$ s <sup>-1/2</sup> ) |
|---------|--------|--------------------|-----------------------|-----------------------------------------|
| BNCO    | 50     | ~3.5               | ~130.3                | —                                       |
|         | 100    | ~3.7               | ~203.1                | ~38.2                                   |
|         | 200    | ~4.0               | ~306.8                | ~73.9                                   |
|         | 300    | ~4.8               | ~410.2                | —                                       |
| NCO NWs | 50     | ~3.9               | ~223.8                | —                                       |
|         | 100    | ~4.1               | ~487.9                | ~22.8                                   |
|         | 200    | ~4.9               | ~882.5                | ~30.2                                   |
|         | 300    | ~7.3               | ~1543.6               | —                                       |
